# Supplementary material for: Comparison of Glyphosate-Degradation Ability of Aldo-Keto Reductase (AKR4) Proteins in Maize, Soybean and Rice
Source: MDPI journal article supplement (doi:10.3390/ijms24043421), 2023-02-08
Supplement: s1 [file s1]

**Table S2.** Primers sequences used in this study.

| Name              | Primer Sequence                                |
|-------------------|------------------------------------------------|
| TA-ZmAKR4-F       | ATGGCGCGGCACTTCGTGCTCA                         |
| TA-ZmAKR4-F       | TTAAAGTTCACCATCCCAGAGC                         |
| TA-EcAKR4-F       | ATGGCGAGGCACTTCGTGCT                           |
| TA-EcAKR4-R       | CTAAAGTTCACCGTCCCAGAGC                         |
| TA-OsAKR4-1-F     | ATGGCGAAGCATTTCGTGCTCAACA                      |
| TA-OsAKR4-1-R     | AGCTCTGGGACGGCGAAATTTAG                        |
| TA-OsAKR4-2-F     | ACCACCGCAACGGAAACAC                            |
| TA-OsAKR4-2-R     | GGCACTGACGGAACCTCTAAAT                         |
| TA-OsAKR4-3-F     | ATGGCCACCCACTTCACGCT                           |
| TA-OsAKR4-3-R     | TTAGATTTCTCCATCAAAAAGCTCC                      |
| TA-OsAKR4-4-F     | ATGGCCATCACAGTGTCTATCT                         |
| TA-OsAKR4-4-R     | TCAAGCAAACAGGTCGATTCCC                         |
| TA-OsALR2-F       | ATGGCGAGTGCCAAGGCGAT                           |
| TA-OsALR2-R       | TTAGACCTCGTTATCCCAGACC                         |
| pET32a-Gm242-F    | CCATGGCTGATATCGGATCCATGTCGAACGATATTGGATTCTTCG  |
| pET32a-Gm242-F    | GTGGTGCTCGAGTGCGGCCGCTTAGATTTACCATCCCATAATTCC  |
| pET32a-ZmAKR4-F   | CCATGGCTGATATCGGATCCATGGCGCGGCACTTCGTGCTCA     |
| pET32a-ZmAKR4-F   | GTGGTGCTCGAGTGCGGCCGCTTAAAGTTCACCATCCCAGAGC    |
| pET32a-EcAKR4-F   | CCATGGCTGATATCGGATCCATGGCGAGGCACTTCGTGCT       |
| pET32a-EcAKR4-R   | GTGGTGCTCGAGTGCGGCCGCTTAAAGTTCACCGTCCCAGAGC    |
| pET32a-OsAKR4-1-F | CCATGGCTGATATCGGATCCATGGCGAAGCATTTCGTGCTCAACA  |
| pET32a-OsAKR4-1-R | GTGGTGCTCGAGTGCGGCCGCGAGCTCTGGGACGGCGAAATTTAG  |
| pET32a-OsAKR4-2-F | CCATGGCTGATATCGGATCCACCACCGCAACGGAAACAC        |
| pET32a-OsAKR4-2-R | GTGGTGCTCGAGTGCGGCCGCGGCACTGACGGAACCTCTAAAT    |
| pET32a-OsAKR4-3-F | CCATGGCTGATATCGGATCCATGGCCACCCACTTCACGCT       |
| pET32a-OsAKR4-3-R | GTGGTGCTCGAGTGCGGCCGCTTAGATTTCTCCATCAAAAAGCTCC |
| pET32a-OsAKR4-4-F | CCATGGCTGATATCGGATCCATGGCCATCACAGTGTCTATCT     |
| pET32a-OsAKR4-4-R | GTGGTGCTCGAGTGCGGCCGCTCAAGCAAACAGGTCGATTCCC    |

| Name              | Primer Sequence                             |
|-------------------|---------------------------------------------|
| pET32a-OsALR1-F   | CCATGGCTGATATCGGATCCATGGCAGGCCGAGCCGGGCGTC  |
| pET32a-OsALR1-R   | GTGGTGCTCGAGTGCGGCCGCTTAGATTTCGCCATCCCAAAGC |
| pET32a-OsALR2-F   | CCATGGCTGATATCGGATCCATGGCGAGTGCCAAGGCGAT    |
| pET32a-OsALR2-R   | GTGGTGCTCGAGTGCGGCCGCTTAGACCTCGTTATCCCAGACC |
| ACTIN-F           | TGCTATGTACGTCGCCATCCAG                      |
| ACTIN-R           | AATGAGTAACCACGCTCCGTCA                      |
| OsAKR4-1-qRTPCR-F | AACACTGAAGACTACATACCACCT                    |
| OsAKR4-1-qRTPCR-R | ACTTACACCAATGGCACGAGA                       |
| OsAKR4-2-qRTPCR-F | CAGCTGTTGACCAGGTGGAG                        |
| OsAKR4-2-qRTPCR-R | CTAGCGGCGAGTATGCAGAAA                       |
| OsAKR4-3-qRTPCR-F | AGGGTACCGGCACATAGACT                        |
| OsAKR4-3-qRTPCR-R | GAGGTCGCTGCACCATATCT                        |
| OsAKR4-4-qRTPCR-F | ACCCGTCATACTGGAGTTGG                        |
| OsAKR4-4-qRTPCR-R | TGCTAATCCCAATGCTGCGA                        |
| OsALR1-qRTPCR-F   | AGGAATCCACCTCTCAGCGT                        |
| OsALR1-qRTPCR-R   | TCTGAATCCCCCACCCTAGA                        |
| OsALR2-qRTPCR-F   | GTGCTCATCAAGTGGGCTCT                        |
| OsALR2-qRTPCR-R   | CTGTCAGGACTCGCTTCTCA                        |
