# Supplementary material for: Comparison of Glyphosate-Degradation Ability of Aldo-Keto Reductase (AKR4) Proteins in Maize, Soybean and Rice
Source: MDPI journal article supplement (doi:10.3390/ijms24043421), 2023-02-08
Supplement: s1 [file s1]

**Table S1.** Information of *OsAKRs* genes in rice genome.

| RGAP-ID <sup>a</sup> | Chromosome<br>Location <sup>a</sup> | gDNA<br>Length <sup>b</sup> | Protein<br>Length <sup>b</sup> | MW (Da) <sup>c</sup> | pI <sup>c</sup> |
|----------------------|-------------------------------------|-----------------------------|--------------------------------|----------------------|-----------------|
| Os12g29760           | 12                                  | 2439                        | 317                            | 34229.9              | 5.22            |
| Os11g42540           | 11                                  | 2878                        | 359                            | 39976.2              | 6.74            |
| Os10g37330           | 10                                  | 4188                        | 376                            | 41141.4              | 9.76            |
| Os10g28320           | 10                                  | 5083                        | 344                            | 37642.9              | 6.01            |
| Os10g02490           | 10                                  | 2997                        | 343                            | 38024.2              | 5.71            |
| Os10g02480           | 10                                  | 5359                        | 331                            | 37016.3              | 6.71            |
| Os10g02380           | 10                                  | 4565                        | 321                            | 35577.6              | 5.11            |
| Os09g39390           | 9                                   | 2998                        | 386                            | 42216.9              | 7.89            |
| Os07g05000           | 7                                   | 3873                        | 378                            | 40600.9              | 8.54            |
| Os07g04990           | 7                                   | 3245                        | 377                            | 40552.8              | 7.1             |
| Os05g39690           | 5                                   | 3015                        | 319                            | 35589.5              | 6.79            |
| Os05g38230           | 5                                   | 3405                        | 335                            | 37674.2              | 8.22            |
| Os04g37490           | 4                                   | 3047                        | 358                            | 39541.2              | 8.61            |
| Os04g37480           | 4                                   | 2370                        | 324                            | 36123.1              | 6.00            |
| Os04g37470           | 4                                   | 2601                        | 334                            | 36501.9              | 7.81            |
| Os04g27300           | 4                                   | 548                         | 120                            | 12391.9              | 11.04           |
| Os04g27060           | 4                                   | 3841                        | 356                            | 38273.2              | 5.85            |
| Os04g26920           | 4                                   | 3193                        | 159                            | 17011.4              | 8.09            |
| Os04g26910           | 4                                   | 3301                        | 352                            | 38233.2              | 6.43            |
| Os04g26890           | 4                                   | 767                         | 179                            | 18557.4              | 9.50            |
| Os04g26870           | 4                                   | 5098                        | 351                            | 38118.5              | 6.98            |
| Os04g08550           | 4                                   | 2951                        | 338                            | 35765.5              | 6.57            |
| Os03g41510           | 3                                   | 4031                        | 406                            | 45663.5              | 8.18            |
| Os03g13390           | 3                                   | 2785                        | 319                            | 35421.3              | 7.44            |
| Os02g57240           | 2                                   | 4637                        | 329                            | 36449.2              | 7.49            |
| Os02g03100           | 2                                   | 2909                        | 383                            | 42559.3              | 8.16            |
| Os01g62880           | 1                                   | 2341                        | 305                            | 33435.1              | 6.17            |
| Os01g62870           | 1                                   | 3972                        | 312                            | 34634.4              | 7.06            |

<sup>a</sup> The information of RGAP-ID and chromosome location were from RGAP database (<http://rice.uga.edu/index.shtml>), <sup>b</sup> the information of gDNA length and protein length were from NCBI database (<https://www.ncbi.nlm.nih.gov>), <sup>c</sup> the information of protein molecular weight and isoelectric point were from Expasy (<https://www.expasy.org/>).
